# Supplementary material for: Regulating the growth of aluminum electrodeposits: towards anode-free Al batteries
Source: Royal Society of Chemistry journal article supplement (doi:10.1039/d0ta08505g), 2020-01-01
Supplement: d0ta08505g1.pdf [file d0ta08505g1.pdf]

## Supporting Information

### Regulating the growth of aluminum electrodeposits: towards anode-free Al batteries

*Qing Zhao<sup>1</sup>, Jingxu Zheng<sup>2</sup>, Yue Deng<sup>2</sup>, Lynden Archer<sup>1,2\*</sup>*

<sup>1</sup>Robert Frederick Smith School of Chemical and Biomolecular Engineering and <sup>2</sup>Department of Materials Science & Engineering, Cornell University, Ithaca, New York 14853, USA.

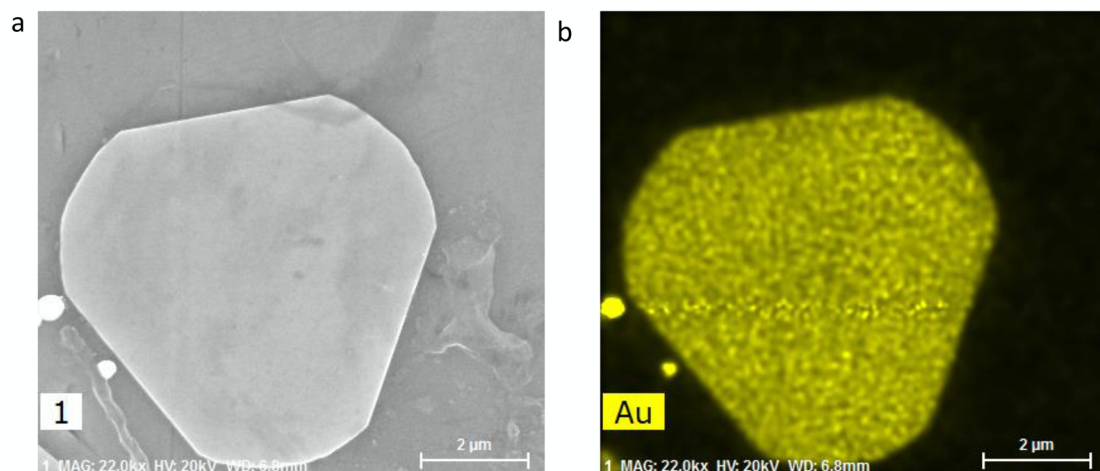

**Figure S1. a) SEM and b) corresponding EDX Au mapping of prepared Au nanosheets.**

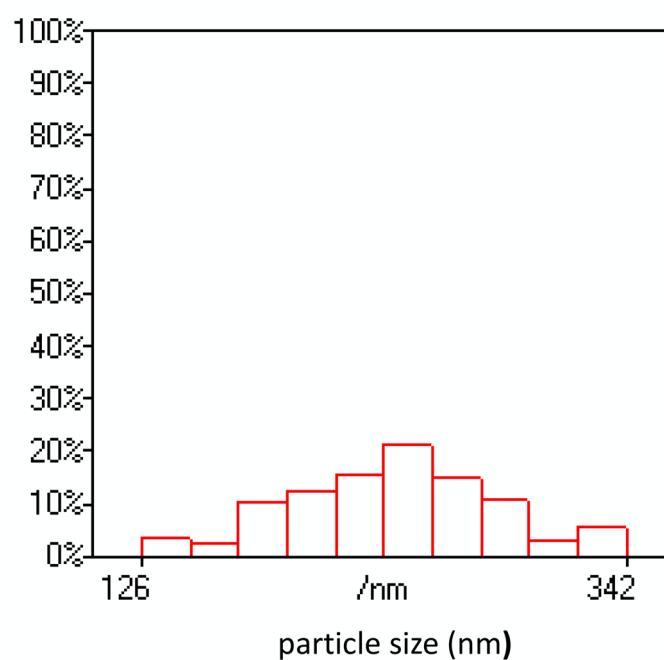

**Figure S2. Size distributions of Al nanoparticles deposited on Au nanosheets.**

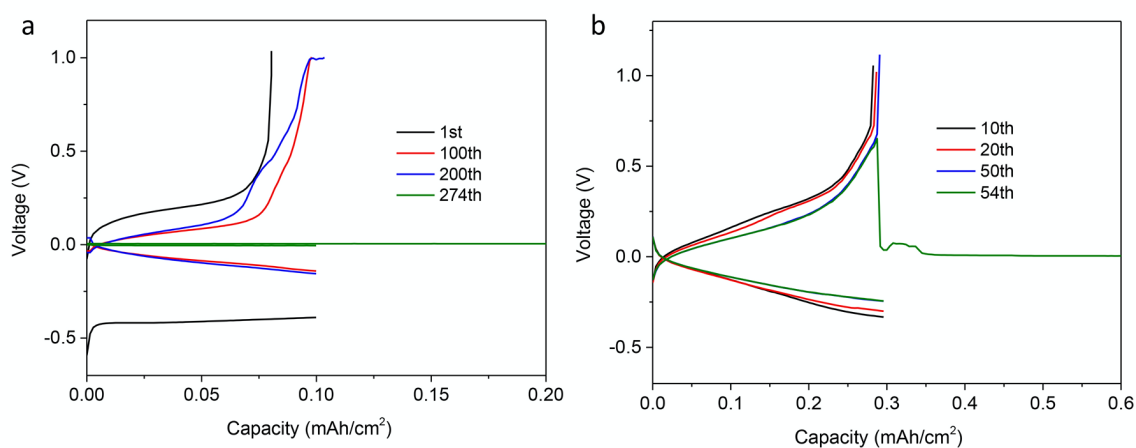

**Figure S3. Al plating and stripping profiles in Al//SS electrochemical cells. a) 1mA/cm² b) 3mA/cm².**

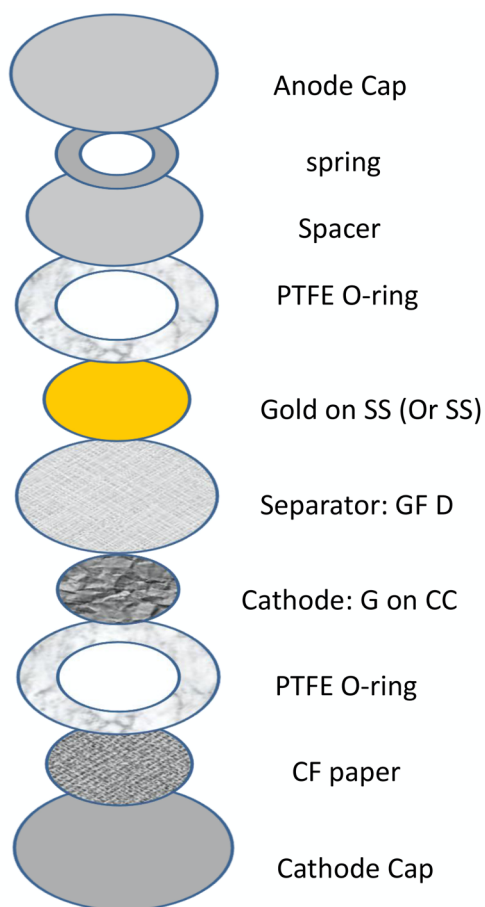

**Figure S4. Structure of a coin type dual-ion Al battery.**

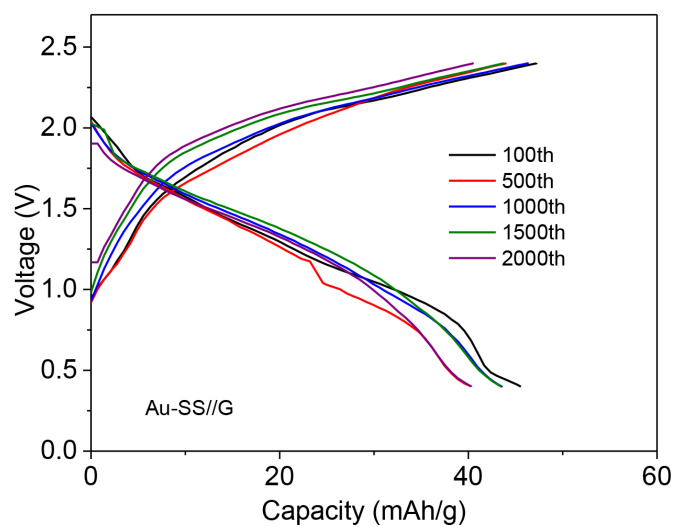

**Figure S5. Charge/Discharge profiles of Au-SS//G batteries at 100th, 500th, 1000th, 1500th, and 2000th cycle.**

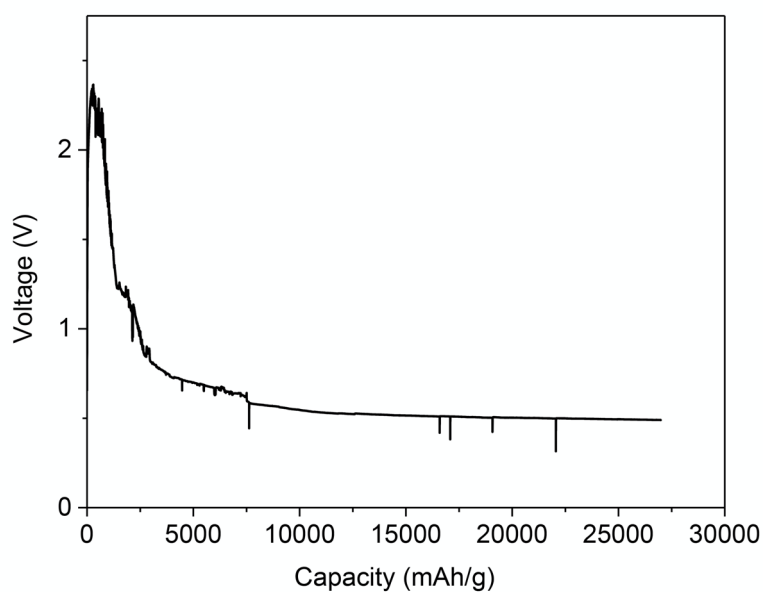

**Figure S6. Typical failure profiles of Al//G batteries and SS//G batteries.**

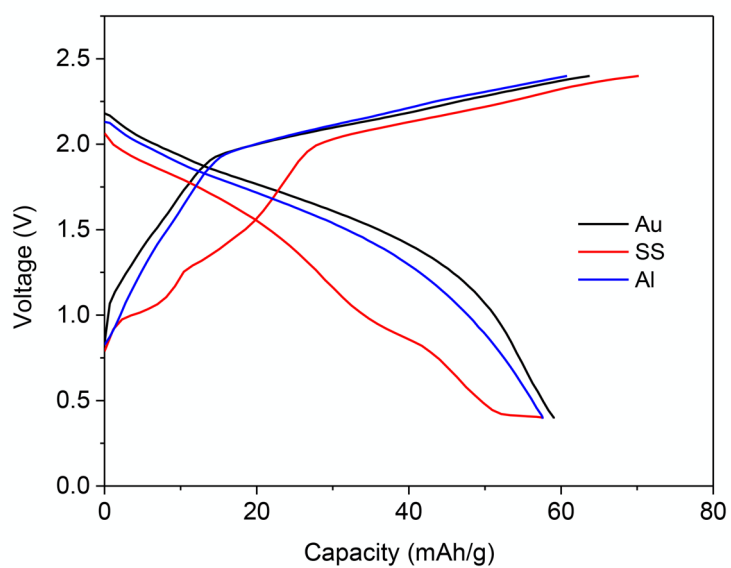

**Figure S7. Polarization comparisons of Au-SS//G batteries, SS//G batteries and Al//G batteries.** The profiles are the fifth cycle of the batteries.
